# Supplementary material for: Evaluation of Antibody Properties and Clinically Relevant Immunogenicity, Anaphylaxis, and Hypersensitivity Reactions in Two Phase III Trials of Tralokinumab in Severe, Uncontrolled Asthma
Source: PubMed Central journal article supplement — Drug Saf. 2019 Jan 16;42(6):769–84. doi: 10.1007/s40264-018-00788-w (PMC6520328; doi:10.1007/s40264-018-00788-w), 2019-01-16
Supplement: 40264_2018_788_MOESM2_ESM.pdf [file 40264_2018_788_MOESM2_ESM.pdf]

# **Evaluation of Antibody Properties and Clinically Relevant Immunogenicity, Anaphylaxis, and Hypersensitivity Reactions in Two Phase III Trials of Tralokinumab in Severe, Uncontrolled Asthma**

## *Drug Safety*

Mats Carlsson,<sup>1</sup> Martin Braddock,<sup>2</sup> Yuling Li,<sup>3</sup> Jihong Wang,<sup>3</sup> Weichen Xu,<sup>3</sup> Nicholas White,<sup>4</sup> Ayman Megally,<sup>5</sup> Gillian Hunter,<sup>6</sup> Gene Colice<sup>5</sup>

<sup>1</sup>Patient Safety, Global Medicines Development, AstraZeneca, Pepparedsleden 1, Mölndal, SE-431 83, Sweden

<sup>2</sup>Global Medicines Development, AstraZeneca, Granta Park, Great Abington, Cambridge, CB21 6GH, United Kingdom

<sup>3</sup>Biopharmaceutical Development, MedImmune, One MedImmune Way, Gaithersburg, Maryland 20878, United States

<sup>4</sup>Clinical Pharmacology, Pharmacometrics and DMPK, MedImmune, Granta Park, Great Abington, Cambridge, CB21 6GH, United Kingdom

<sup>5</sup>Global Medicines Development, AstraZeneca, One MedImmune Way, Gaithersburg, Maryland 20878, United States

<sup>6</sup>Biometrics and Information Sciences, AstraZeneca, Granta Park, Great Abington, Cambridge, CB21 6GH, United Kingdom

**Corresponding author:** Mats Carlsson, Patient Safety, Global Medicines Development, AstraZeneca, Pepparedsleden 1, Mölndal, SE-431 83, Sweden.

[Mats.Carlsson@astrazeneca.com](mailto:Mats.Carlsson@astrazeneca.com)

## Electronic Supplementary Material 2

Fc glycosylation variants in tralokinumab across different manufacturing lots

| Lot number | Afucosylation (%) | Galactosylation (%) | $\alpha$ -Gal (%) | Sialylation (%) | High-mannose (%) | Aglycosylation (%) |
|------------|-------------------|---------------------|-------------------|-----------------|------------------|--------------------|
| 1          | 2.2               | 30.4                | 3.7               | 13.7            | 1.7              | 1.0                |
| 2          | 1.9               | 36.1                | 4.2               | 17.3            | 1.5              | 1.3                |
| 3          | 1.7               | 43.8                | 5.7               | 21.3            | 1.3              | 2.0                |
| 4          | 1.7               | 50.2                | 9.0               | 22.8            | 1.3              | 2.1                |
| 5          | 1.7               | 44.2                | 6.3               | 20.8            | 1.4              | 1.7                |
| 6          | 1.5               | 42.5                | 5.7               | 24.1            | 1.1              | 1.4                |
| 7          | 1.6               | 41.8                | 3.8               | 12.4            | 1.2              | 1.2                |
| 8          | 1.7               | 33.6                | 1.4               | 5.5             | 1.1              | 1.0                |
| 9          | 0.7               | 32.3                | 2.4               | 5.4             | 0.7              | 1.3                |
| 10         | 1.1               | 38.2                | 3.3               | 3.9             | 0.7              | 1.8                |
| 11         | 0.9               | 45.7                | 5.1               | 12.6            | 0.7              | 0.9                |
| 12         | 0.7               | 46.7                | 7.7               | 14.1            | 0.5              | 0.7                |
| 13         | 0.5               | 50.6                | 8.5               | 15.3            | 0.4              | 0.5                |
| 14         | 0.4               | 50.8                | 9.4               | 15.2            | 0.4              | 0.4                |
| 15         | 0.5               | 45.4                | 4.2               | 10.9            | 0.5              | 0.5                |
| 16         | 0.6               | 46.1                | 4.5               | 11              | 0.6              | 0.6                |
| 17         | 1.0               | 37.1                | 2.3               | 11.4            | 0.8              | 1.0                |
| 18         | 1.2               | 37.4                | 3.2               | 10.8            | 0.8              | 1.2                |
| 19         | 1.2               | 40.1                | 3.1               | 11.6            | 0.9              | 1.2                |

$\alpha$ -Gal, galactose- $\alpha$ -1,3-galactose
