# Supplementary material for: Evaluation of Antibody Properties and Clinically Relevant Immunogenicity, Anaphylaxis, and Hypersensitivity Reactions in Two Phase III Trials of Tralokinumab in Severe, Uncontrolled Asthma
Source: PubMed Central journal article supplement — Drug Saf. 2019 Jan 16;42(6):769–84. doi: 10.1007/s40264-018-00788-w (PMC6520328; doi:10.1007/s40264-018-00788-w), 2019-01-16

# **Evaluation of Antibody Properties and Clinically Relevant Immunogenicity, Anaphylaxis, and Hypersensitivity Reactions in Two Phase III Trials of Tralokinumab in Severe, Uncontrolled Asthma**

## *Drug Safety*

Mats Carlsson,<sup>1</sup> Martin Braddock,<sup>2</sup> Yuling Li,<sup>3</sup> Jihong Wang,<sup>3</sup> Weichen Xu,<sup>3</sup> Nicholas White,<sup>4</sup> Ayman Megally,<sup>5</sup> Gillian Hunter,<sup>6</sup> Gene Colice<sup>5</sup>

<sup>1</sup>Patient Safety, Global Medicines Development, AstraZeneca, Pepparedsleden 1, Mölndal, SE-431 83, Sweden

<sup>2</sup>Global Medicines Development, AstraZeneca, Granta Park, Great Abington, Cambridge, CB21 6GH, United Kingdom

<sup>3</sup>Biopharmaceutical Development, MedImmune, One MedImmune Way, Gaithersburg, Maryland 20878, United States

<sup>4</sup>Clinical Pharmacology, Pharmacometrics and DMPK, MedImmune, Granta Park, Great Abington, Cambridge, CB21 6GH, United Kingdom

<sup>5</sup>Global Medicines Development, AstraZeneca, One MedImmune Way, Gaithersburg, Maryland 20878, United States

<sup>6</sup>Biometrics and Information Sciences, AstraZeneca, Granta Park, Great Abington, Cambridge, CB21 6GH, United Kingdom

**Corresponding author:** Mats Carlsson, Patient Safety, Global Medicines Development, AstraZeneca, Pepparedsleden 1, Mölndal, SE-431 83, Sweden.

[Mats.Carlsson@astrazeneca.com](mailto:Mats.Carlsson@astrazeneca.com)

### Electronic Supplementary Material 3

Disulphide bond pattern of tralokinumab.  $C_{H1}$  Heavy Chain Constant Domain 1,  $C_{H2}$  Heavy Chain Constant Domain 2,  $C_{H3}$  Heavy Chain Constant Domain 3,  $C_L$  Light Chain Constant Domain,  $Cys$  cysteine,  $Fab$  fragment antigen-binding,  $Fc$  fragment crystallizable,  $HC$  heavy chain,  $LC$  light chain,  $V_H$  Heavy Chain Variable Domain,  $V_L$  Light Chain Variable Domain

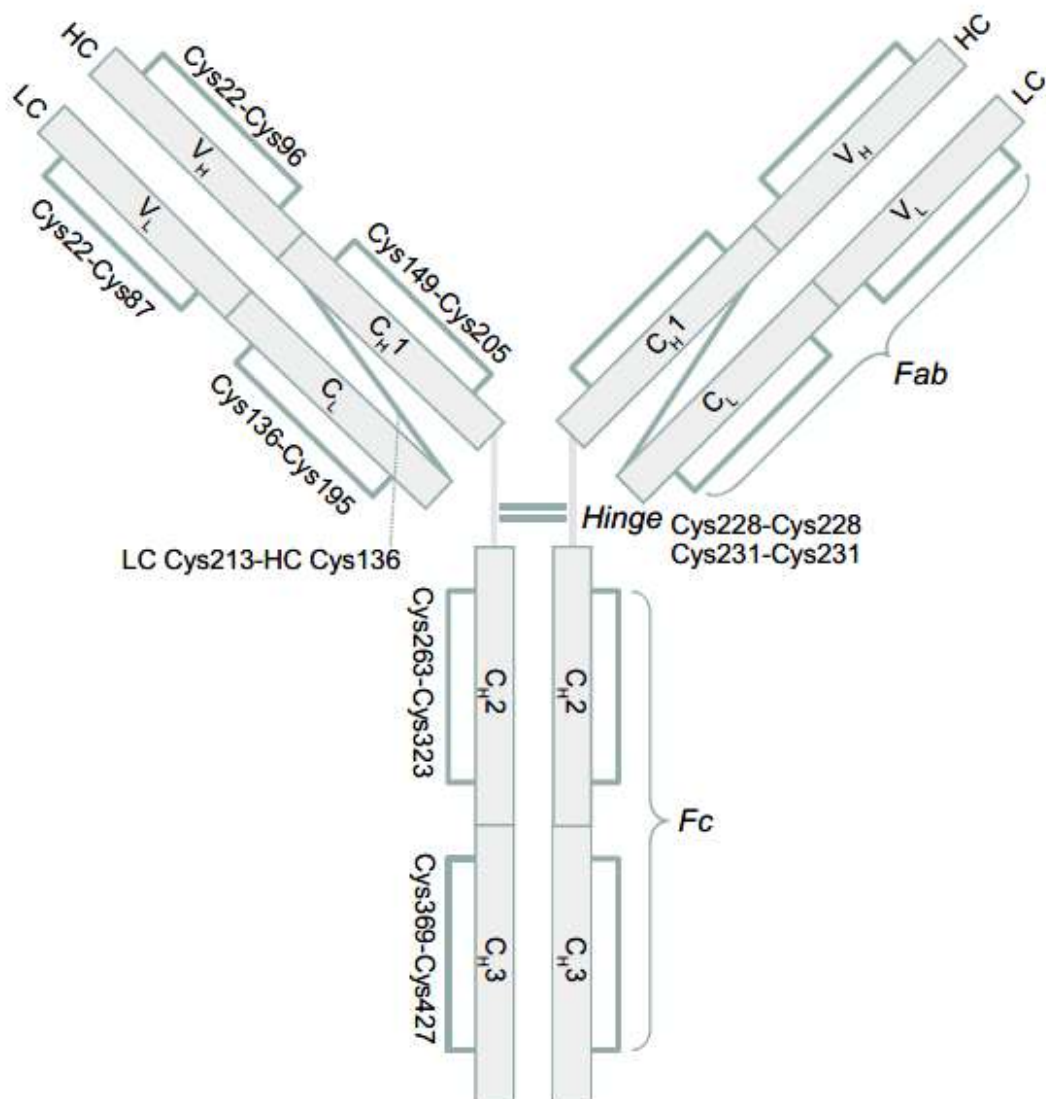

Supplement: 40264_2018_788_MOESM3_ESM.pdf [file 40264_2018_788_MOESM3_ESM.pdf]
