# Supplementary material for: Evaluation of Antibody Properties and Clinically Relevant Immunogenicity, Anaphylaxis, and Hypersensitivity Reactions in Two Phase III Trials of Tralokinumab in Severe, Uncontrolled Asthma
Source: PubMed Central journal article supplement — Drug Saf. 2019 Jan 16;42(6):769–84. doi: 10.1007/s40264-018-00788-w (PMC6520328; doi:10.1007/s40264-018-00788-w), 2019-01-16
Supplement: 40264_2018_788_MOESM5_ESM.pdf [file 40264_2018_788_MOESM5_ESM.pdf]

# **Evaluation of Antibody Properties and Clinically Relevant Immunogenicity, Anaphylaxis, and Hypersensitivity Reactions in Two Phase III Trials of Tralokinumab in Severe, Uncontrolled Asthma**

## *Drug Safety*

Mats Carlsson,<sup>1</sup> Martin Braddock,<sup>2</sup> Yuling Li,<sup>3</sup> Jihong Wang,<sup>3</sup> Weichen Xu,<sup>3</sup> Nicholas White,<sup>4</sup> Ayman Megally,<sup>5</sup> Gillian Hunter,<sup>6</sup> Gene Colice<sup>5</sup>

<sup>1</sup>Patient Safety, Global Medicines Development, AstraZeneca, Pepparedsleden 1, Mölndal, SE-431 83, Sweden

<sup>2</sup>Global Medicines Development, AstraZeneca, Granta Park, Great Abington, Cambridge, CB21 6GH, United Kingdom

<sup>3</sup>Biopharmaceutical Development, MedImmune, One MedImmune Way, Gaithersburg, Maryland 20878, United States

<sup>4</sup>Clinical Pharmacology, Pharmacometrics and DMPK, MedImmune, Granta Park, Great Abington, Cambridge, CB21 6GH, United Kingdom

<sup>5</sup>Global Medicines Development, AstraZeneca, One MedImmune Way, Gaithersburg, Maryland 20878, United States

<sup>6</sup>Biometrics and Information Sciences, AstraZeneca, Granta Park, Great Abington, Cambridge, CB21 6GH, United Kingdom

**Corresponding author:** Mats Carlsson, Patient Safety, Global Medicines Development, AstraZeneca, Pepparedsleden 1, Mölndal, SE-431 83, Sweden.

[Mats.Carlsson@astrazeneca.com](mailto:Mats.Carlsson@astrazeneca.com)

## Electronic Supplementary Material 5

Free thiol percentages by tralokinumab domain

| Location of cysteine bond     | Identity of cysteine residue | Free thiol (%)       |
|-------------------------------|------------------------------|----------------------|
| V <sub>L</sub> ; intra-chain  | LC Cys22+NEM                 | 0.2%                 |
|                               | LC Cys87+NEM                 | ND                   |
| C <sub>L</sub> ; intra-chain  | LC Cys136+NEM                | 0.3%                 |
|                               | LC Cys195+NEM                | 0.7%                 |
| LC-HC; inter-chain            | LC Cys213+NEM                | 0.4%                 |
|                               | HC Cys136+NEM                | 0.3%                 |
| V <sub>H</sub> ; intra-chain  | HC Cys22+NEM                 | ND                   |
|                               | HC Cys96+NEM                 | ND                   |
| C <sub>H1</sub> ; intra-chain | HC Cys149+NEM                | 2.6%                 |
|                               | HC Cys205+NEM                | 4.1%                 |
| Hinge HC-HC; inter-chain      | HC Cys228+NEM                | ND                   |
|                               | HC Cys231+NEM                | ND                   |
| C <sub>H2</sub> ; intra-chain | HC Cys263+NEM                | 2.3%                 |
|                               | HC Cys323+NEM                | Peptide not detected |
| C <sub>H3</sub> ; intra-chain | HC Cys369+NEM                | 2.1%                 |
|                               | HC Cys427+NEM                | 2.6%                 |

Cys: cysteine, C<sub>H1</sub> Heavy Chain Constant Domain 1, C<sub>H2</sub> Heavy Chain Constant Domain 2, C<sub>H3</sub> Heavy Chain Constant Domain 3, C<sub>L</sub> Light Chain Constant Domain, HC Heavy Chain, LC Light Chain, ND not detected, NEM N-ethylmaleimide, V<sub>H</sub> Heavy Chain Variable Domain, V<sub>L</sub> Light Chain Variable Domain
