# Supplementary material for: Evaluation of Antibody Properties and Clinically Relevant Immunogenicity, Anaphylaxis, and Hypersensitivity Reactions in Two Phase III Trials of Tralokinumab in Severe, Uncontrolled Asthma
Source: PubMed Central journal article supplement — Drug Saf. 2019 Jan 16;42(6):769–84. doi: 10.1007/s40264-018-00788-w (PMC6520328; doi:10.1007/s40264-018-00788-w), 2019-01-16
Supplement: 40264_2018_788_MOESM7_ESM.pdf [file 40264_2018_788_MOESM7_ESM.pdf]

# **Evaluation of Antibody Properties and Clinically Relevant Immunogenicity, Anaphylaxis, and Hypersensitivity Reactions in Two Phase III Trials of Tralokinumab in Severe, Uncontrolled Asthma**

## *Drug Safety*

Mats Carlsson,<sup>1</sup> Martin Braddock,<sup>2</sup> Yuling Li,<sup>3</sup> Jihong Wang,<sup>3</sup> Weichen Xu,<sup>3</sup> Nicholas White,<sup>4</sup> Ayman Megally,<sup>5</sup> Gillian Hunter,<sup>6</sup> Gene Colice<sup>5</sup>

<sup>1</sup>Patient Safety, Global Medicines Development, AstraZeneca, Pepparedsleden 1, Mölndal, SE-431 83, Sweden

<sup>2</sup>Global Medicines Development, AstraZeneca, Granta Park, Great Abington, Cambridge, CB21 6GH, United Kingdom

<sup>3</sup>Biopharmaceutical Development, MedImmune, One MedImmune Way, Gaithersburg, Maryland 20878, United States

<sup>4</sup>Clinical Pharmacology, Pharmacometrics and DMPK, MedImmune, Granta Park, Great Abington, Cambridge, CB21 6GH, United Kingdom

<sup>5</sup>Global Medicines Development, AstraZeneca, One MedImmune Way, Gaithersburg, Maryland 20878, United States

<sup>6</sup>Biometrics and Information Sciences, AstraZeneca, Granta Park, Great Abington, Cambridge, CB21 6GH, United Kingdom

**Corresponding author:** Mats Carlsson, Patient Safety, Global Medicines Development, AstraZeneca, Pepparedsleden 1, Mölndal, SE-431 83, Sweden.

[Mats.Carlsson@astrazeneca.com](mailto:Mats.Carlsson@astrazeneca.com)

## Electronic Supplementary Material 7

Adverse events of hypersensitivity, anaphylactic reaction, and anaphylactic shock condition reported during the treatment period of STRATOS 1 and STRATOS 2 (safety analysis set)

| STRATOS 1                                                                                    | Tralo Q2W<br>(N = 398) | Tralo Q4W<br>(N = 404) | Placebo<br>(N = 400) |
|----------------------------------------------------------------------------------------------|------------------------|------------------------|----------------------|
| Participants with any relevant AE, <i>n</i> (%)                                              | 103 (25.9)             | 101 (25.0)             | 102 (25.5)           |
| Most frequently reported relevant AEs ( $\geq 3$ participants on tralokinumab), <i>n</i> (%) |                        |                        |                      |
| Asthma                                                                                       | 47 (11.8)              | 48 (11.9)              | 51 (12.8)            |
| Cough                                                                                        | 12 (3.0)               | 13 (3.2)               | 12 (3.0)             |
| Rhinitis allergic                                                                            | 10 (2.5)               | 15 (3.7)               | 14 (3.5)             |
| Dyspnea                                                                                      | 5 (1.3)                | 9 (2.2)                | 7 (1.8)              |
| Rash                                                                                         | 8 (2.0)                | 4 (1.0)                | 5 (1.3)              |
| Injection site hypersensitivity                                                              | 5 (1.3)                | 4 (1.0)                | 0                    |
| Pruritus                                                                                     | 5 (1.3)                | 3 (0.7)                | 3 (0.8)              |
| Urticaria                                                                                    | 3 (0.8)                | 4 (1.0)                | 4 (1.0)              |
| Erythema                                                                                     | 5 (1.3)                | 1 (0.2)                | 0                    |
| Injection site rash                                                                          | 4 (1.0)                | 1 (0.2)                | 0                    |
| Conjunctivitis                                                                               | 2 (0.5)                | 2 (0.5)                | 3 (0.8)              |
| Dermatitis contact                                                                           | 1 (0.3)                | 3 (0.7)                | 0                    |
| Injection site urticaria                                                                     | 3 (0.8)                | 1 (0.2)                | 1 (0.3)              |
| Conjunctivitis allergic                                                                      | 2 (0.5)                | 1 (0.2)                | 1 (0.3)              |
| Seasonal allergy                                                                             | 2 (0.5)                | 1 (0.2)                | 5 (1.3)              |
| Wheezing                                                                                     | 2 (0.5)                | 1 (0.2)                | 5 (1.3)              |
| STRATOS 2                                                                                    | Tralo Q2W<br>(N = 425) |                        | Placebo<br>(N = 422) |
| Participants with any relevant AE, <i>n</i> (%)                                              | 56 (13.2)              |                        | 38 (9.0)             |
| Most frequently reported relevant AEs ( $\geq 3$ participants on tralokinumab), <i>n</i> (%) |                        |                        |                      |
| Asthma                                                                                       | 14 (3.3)               |                        | 16 (3.8)             |
| Pruritus                                                                                     | 6 (1.4)                |                        | 2 (0.5)              |
| Rash                                                                                         | 5 (1.2)                |                        | 0                    |
| Skin reaction                                                                                | 5 (1.2)                |                        | 0                    |
| Erythema                                                                                     | 3 (0.7)                |                        | 0                    |

AE adverse event, Q2W every 2 weeks, Q4W every 4 weeks, *tralo* tralokinumab
