# Supplementary material for: Evaluation of Antibody Properties and Clinically Relevant Immunogenicity, Anaphylaxis, and Hypersensitivity Reactions in Two Phase III Trials of Tralokinumab in Severe, Uncontrolled Asthma
Source: PubMed Central journal article supplement — Drug Saf. 2019 Jan 16;42(6):769–84. doi: 10.1007/s40264-018-00788-w (PMC6520328; doi:10.1007/s40264-018-00788-w), 2019-01-16
Supplement: 40264_2018_788_MOESM8_ESM.pdf [file 40264_2018_788_MOESM8_ESM.pdf]

# **Evaluation of Antibody Properties and Clinically Relevant Immunogenicity, Anaphylaxis, and Hypersensitivity Reactions in Two Phase III Trials of Tralokinumab in Severe, Uncontrolled Asthma**

## *Drug Safety*

Mats Carlsson,<sup>1</sup> Martin Braddock,<sup>2</sup> Yuling Li,<sup>3</sup> Jihong Wang,<sup>3</sup> Weichen Xu,<sup>3</sup> Nicholas White,<sup>4</sup> Ayman Megally,<sup>5</sup> Gillian Hunter,<sup>6</sup> Gene Colice<sup>5</sup>

<sup>1</sup>Patient Safety, Global Medicines Development, AstraZeneca, Pepparedsleden 1, Mölndal, SE-431 83, Sweden

<sup>2</sup>Global Medicines Development, AstraZeneca, Granta Park, Great Abington, Cambridge, CB21 6GH, United Kingdom

<sup>3</sup>Biopharmaceutical Development, MedImmune, One MedImmune Way, Gaithersburg, Maryland 20878, United States

<sup>4</sup>Clinical Pharmacology, Pharmacometrics and DMPK, MedImmune, Granta Park, Great Abington, Cambridge, CB21 6GH, United Kingdom

<sup>5</sup>Global Medicines Development, AstraZeneca, One MedImmune Way, Gaithersburg, Maryland 20878, United States

<sup>6</sup>Biometrics and Information Sciences, AstraZeneca, Granta Park, Great Abington, Cambridge, CB21 6GH, United Kingdom

**Corresponding author:** Mats Carlsson, Patient Safety, Global Medicines Development, AstraZeneca, Pepparedsleden 1, Mölndal, SE-431 83, Sweden.

[Mats.Carlsson@astrazeneca.com](mailto:Mats.Carlsson@astrazeneca.com)

## Electronic Supplementary Material 8

## Independent evaluation of anaphylaxis and hypersensitivity reactions

| AE identified as possible anaphylaxis | Number of events |           |         | Presence of the following, consistent with Sampson criteria |                       |                       |                          |                            | AE considered by external evaluator as |                                   |
|---------------------------------------|------------------|-----------|---------|-------------------------------------------------------------|-----------------------|-----------------------|--------------------------|----------------------------|----------------------------------------|-----------------------------------|
|                                       | Tralo Q2W        | Tralo Q4W | Placebo | Shock                                                       | Respiratory component | Dermatology component | Cardiovascular component | Gastrointestinal component | Anaphylaxis                            | Non-anaphylactic hypersensitivity |
| <b>STRATOS 1</b>                      |                  |           |         |                                                             |                       |                       |                          |                            |                                        |                                   |
| Angioedema                            | 1                | 0         | 0       | No                                                          | No                    | No                    | No                       | No                         | No                                     | Undetermined                      |
| Asthma                                | 1                | 0         | 0       | No                                                          | No                    | No                    | No                       | No                         | No                                     | No                                |
| Blood pressure decreased              | 0                | 0         | 1       | No                                                          | No                    | No                    | No                       | No                         | No                                     | No                                |
| Circulatory collapse                  | 1                | 0         | 0       | Undetermined                                                | No                    | No                    | No                       | No                         | No                                     | No                                |
| Cough                                 | 1                | 0         | 1       | No                                                          | No                    | No                    | No                       | No                         | No                                     | No                                |
| Dizziness                             | 0                | 0         | 2       | No                                                          | No                    | No                    | No                       | No                         | No                                     | No                                |
| Drug hypersensitivity                 | 0                | 3         | 0       | No                                                          | No                    | No                    | No                       | No                         | No                                     | No                                |
| Dyspnea                               | 1                | 0         | 0       | No                                                          | No                    | No                    | No                       | No                         | No                                     | No                                |
| Erythema                              | 1                | 0         | 0       | No                                                          | No                    | No                    | No                       | No                         | No                                     | No                                |
| Injection site reaction               | 1                | 0         | 0       | No                                                          | No                    | No                    | No                       | No                         | No                                     | No                                |
| Injection site urticaria              | 1                | 0         | 0       | No                                                          | No                    | No                    | No                       | No                         | No                                     | No                                |
| Lip swelling                          | 0                | 1         | 0       | No                                                          | No                    | No                    | No                       | No                         | No                                     | No                                |
| Pharyngeal edema                      | 1                | 0         | 0       | No                                                          | No                    | No                    | No                       | No                         | No                                     | Undetermined*                     |
| Pruritus                              | 1                | 0         | 0       | No                                                          | No                    | No                    | No                       | No                         | No                                     | No                                |

|                   |   |   |   |    |    |    |    |    |    |    |               |
|-------------------|---|---|---|----|----|----|----|----|----|----|---------------|
| Rash              | 0 | 0 | 1 | No            |
| Somnolence        | 0 | 2 | 0 | No            |
| Swollen tongue    | 1 | 0 | 0 | No | Undetermined* |
| Syncope           | 1 | 2 | 2 | No            |
| Throat irritation | 1 | 0 | 0 | No            |
| Vomiting          | 0 | 0 | 2 | No            |
| Wheezing          | 1 | 0 | 1 | No            |

---

**STRATOS 2**

|                          |   |   |   |    |                                                                                               |                                                                |     |    |    |                                                                                                     |                                                                                                                                                        |
|--------------------------|---|---|---|----|-----------------------------------------------------------------------------------------------|----------------------------------------------------------------|-----|----|----|-----------------------------------------------------------------------------------------------------|--------------------------------------------------------------------------------------------------------------------------------------------------------|
| Blood pressure decreased | 1 | – | 0 | No | No                                                                                            | No                                                             | Yes | No | No | No                                                                                                  | No                                                                                                                                                     |
| Eyelid edema             | 1 | – | 1 | No | No                                                                                            | No ( <i>n</i> = 1, placebo);<br>Yes ( <i>n</i> = 1, tralo Q2W) | No  | No | No | No                                                                                                  | No ( <i>n</i> = 1, placebo);<br>Undetermined ( <i>n</i> = 1, tralo Q2W)                                                                                |
| Hypotension              | 0 | – | 1 | No | No                                                                                            | No                                                             | Yes | No | No | No                                                                                                  | No                                                                                                                                                     |
| Pruritus                 | 2 | – | 1 | No | No                                                                                            | Yes                                                            | No  | No | No | No                                                                                                  | Undetermined                                                                                                                                           |
| Rash                     | 4 | – | 0 | No | No                                                                                            | No ( <i>n</i> = 1);<br>Yes ( <i>n</i> = 3)                     | No  | No | No | No                                                                                                  | No ( <i>n</i> = 1);<br>Undetermined ( <i>n</i> = 3)                                                                                                    |
| Rash generalized         | 0 | – | 1 | No | No                                                                                            | Yes                                                            | No  | No | No | No                                                                                                  | No                                                                                                                                                     |
| Rash macular             | 0 | – | 1 | No | No                                                                                            | Yes                                                            | No  | No | No | No                                                                                                  | Undetermined                                                                                                                                           |
| Urticaria                | 2 | – | 3 | No | No ( <i>n</i> = 4; <i>n</i> = 2, placebo; <i>n</i> = 2, Q2W);<br>Yes ( <i>n</i> = 1, placebo) | Yes                                                            | No  | No | No | No ( <i>n</i> = 4; <i>n</i> = 2, placebo; <i>n</i> = 2, tralo Q2W);<br>Yes ( <i>n</i> = 1, placebo) | Undetermined ( <i>n</i> = 3; <i>n</i> = 2, placebo; <i>n</i> = 1, tralo Q2W);<br>Yes ( <i>n</i> = 1, tralo Q2W); <sup>a</sup> ( <i>n</i> = 1, placebo) |

|          |   |   |   |    |     |     |    |    |     |              |
|----------|---|---|---|----|-----|-----|----|----|-----|--------------|
| Wheezing | 0 | – | 1 | No | Yes | Yes | No | No | Yes | <sup>a</sup> |
|----------|---|---|---|----|-----|-----|----|----|-----|--------------|

---

*AE*, adverse event; *Q2W*, every 2 weeks; *Q4W*, every 4 weeks; *tralo*, tralokinumab

<sup>a</sup>No anaphylactic hypersensitivity judgment made by external evaluator, due to lack of narrative information available

– indicates Q4W treatment arm not used in STRATOS 2 trial

**\*Case narrative for subject who discontinued treatment due to pharyngeal oedema and swollen tongue, reported as serious AEs**

This subject's current medical conditions included asthma triggered by allergens and iodine, allergic rhinitis, chronic sinusitis, and eczema. The subject was randomized to receive tralokinumab with a dosing regimen of Q2W (total expected doses 26). On the day of first dose (of one dose received) of tralokinumab, the subject developed serious adverse events of swollen tongue and pharyngeal oedema. At the time of discharge, two hours after receiving the investigational product, no complications had been reported. However, 5 minutes after discharge, the subject experienced slight symptoms of tingling on the tongue and in the throat. After 10 more minutes, the subject had difficulty swallowing water, following which the subject took diphenhydramine 25 mg daily orally. At 30 minutes from discharge, the subject had difficulty forming words due to swelling of the tongue. The subject did not seek any medical help, but decided to self-medicate with cetirizine 10 mg daily orally for swollen tongue. The symptoms dissipated gradually on the same day but did not resolve completely. However, the subject's condition improved by next morning and had recovered from the events two days after receiving the dose.

Both the events were considered by the Investigator to be important medical events of moderate intensity, related to the investigational product. As a result of the events, the investigational product was permanently discontinued on the first day of administration, which was also the last dose prior to discontinuation.
